# Supplementary material for: PdCu alloy nanodendrites with tunable composition as highly active electrocatalysts for methanol oxidation
Source: Royal Society of Chemistry journal article supplement (doi:10.1039/c6ra25900f), 2017-01-01
Supplement: c6ra25900f1.pdf [file c6ra25900f1.pdf]

## **PdCu alloy nanodendrites with tunable composition as highly active electrocatalysts for methanol oxidation**

Yaling Xiong,<sup>a,†</sup> Wenying Ye,<sup>a,†</sup> Wenlong Chen,<sup>b,†</sup> Yiwen Wu,<sup>a</sup> Qingfeng Xu,<sup>a</sup> Yucong Yan,<sup>a</sup> Hui Zhang,<sup>a,\*</sup> Jianbo Wu,<sup>b,\*</sup> and Deren Yang<sup>a,\*</sup>

<sup>a</sup>State Key Laboratory of Silicon Materials, School of Materials Science & Engineering, and Cyrus Tang Center for Sensor Materials and Applications, Zhejiang University, Hangzhou, Zhejiang 310027, People's Republic of China. Email: msezhanghui@zju.edu.cn, mseyang@zju.edu.cn

<sup>b</sup>State Key Laboratory of Metal Matrix Composites, School of Materials Science and Engineering, Shanghai Jiao Tong University, 800 Dongchuan Rd, Shanghai, 200240, People's Republic of China. Email: jianbowu@sjtu.edu.cn

<sup>†</sup>These authors contributed equally to this work.

**Table S1.** ICP-AES and ECSA data (normalized to Pd) of the PdCu alloy nanostructures including the commercial Pd/C.

| Samples     | Molar ratios of Pd/Cu precursors | Atomic ratios of Pd/Cu | Molecular formula                 | ECSA (m <sup>2</sup> /g) |
|-------------|----------------------------------|------------------------|-----------------------------------|--------------------------|
| PdCu alloys | 4:1                              | 3.39:1                 | Pd <sub>77</sub> Cu <sub>23</sub> | 23.12                    |
|             | 2:1                              | 1.89:1                 | Pd <sub>65</sub> Cu <sub>35</sub> | 34.16                    |
|             | 1:1                              | 0.91:1                 | Pd <sub>48</sub> Cu <sub>52</sub> | 40.49                    |
|             | 2:3                              | 0.74:1                 | Pd <sub>43</sub> Cu <sub>57</sub> | 23.89                    |
|             | 1:3                              | 0.54:1                 | Pd <sub>35</sub> Cu <sub>65</sub> | 24.82                    |
| Pd/C        | /                                | /                      | /                                 | 33.0                     |

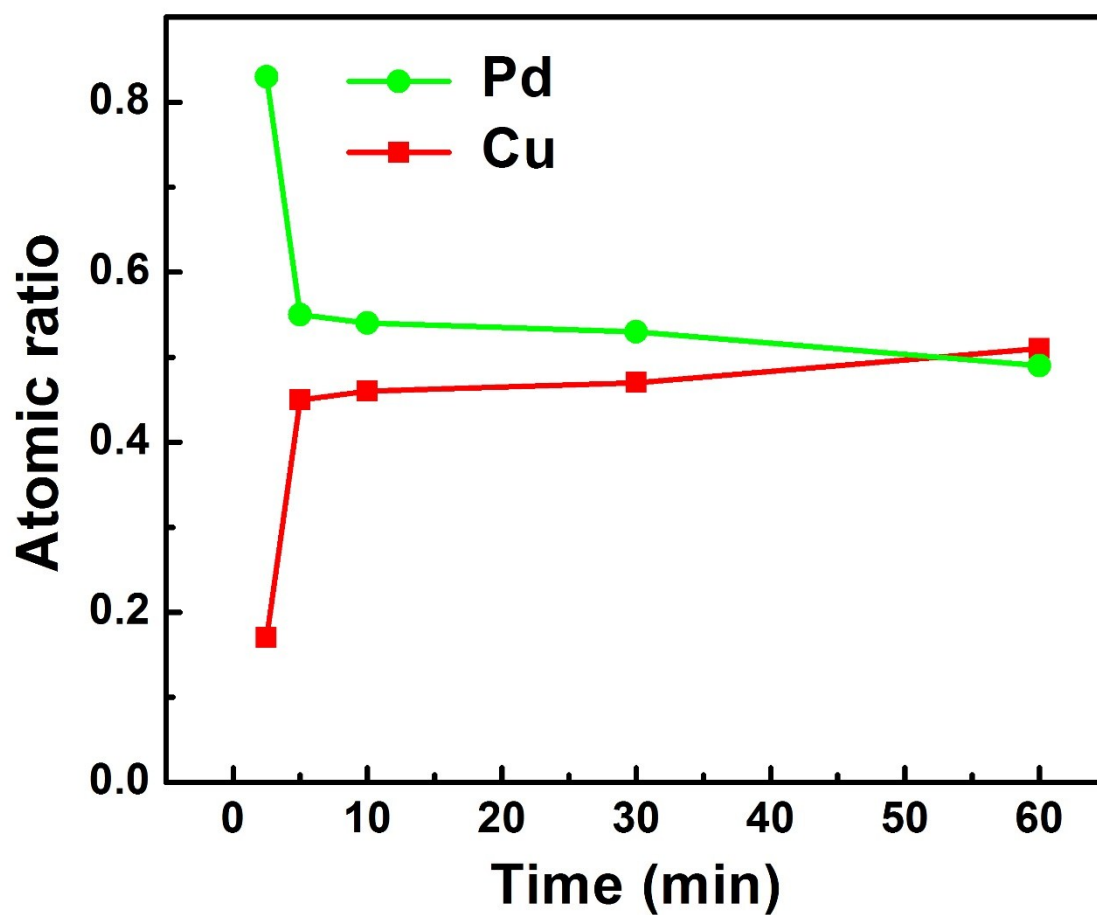

**Figure. S1** ICP-AES data of the PdCu nanostructures prepared using the standard procedure, except for different period of the reaction from 2.5 to 5, 10, 30 and 60 min.

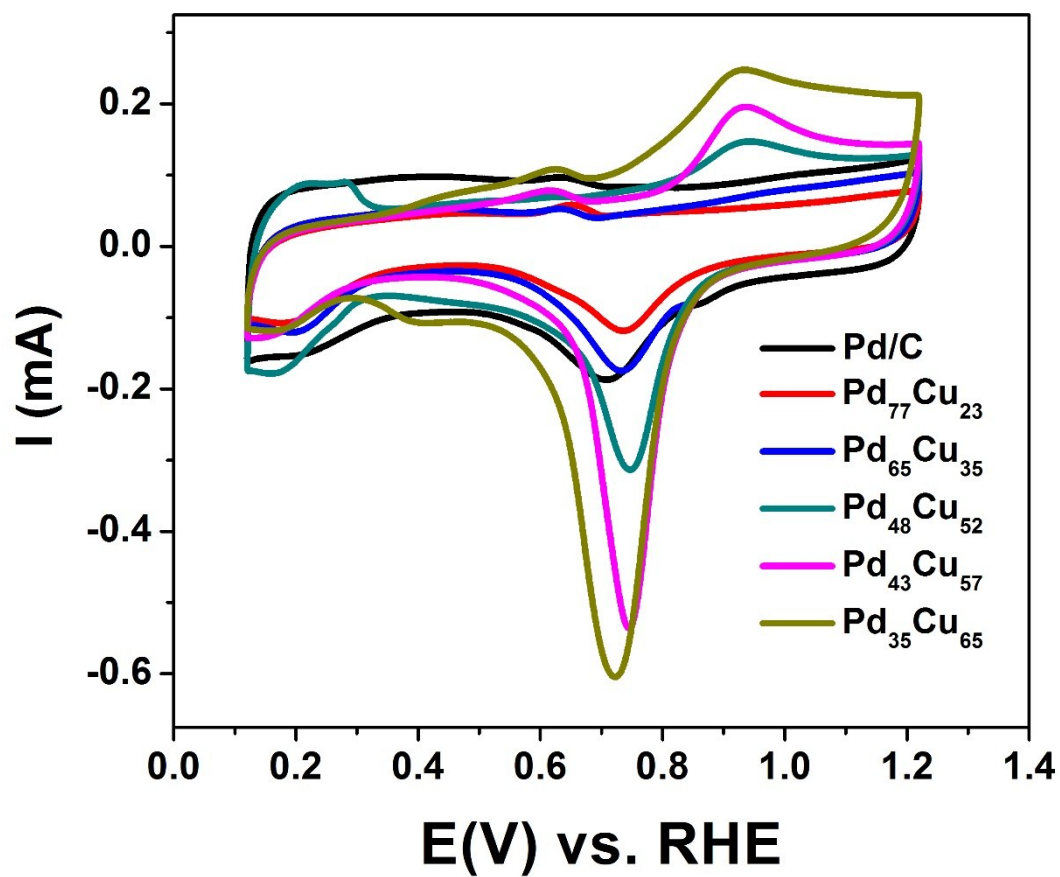

**Figure. S2** Cyclic voltammograms (CVs) of the five PdCu/C catalysts and commercial Pd/C in an Ar-saturated 0.1 M KOH solution at a sweep rate of 50 mV/s

**Table S2.** Comparison of the critical MOR parameters for our Pd<sub>35</sub>Cu<sub>65</sub> alloy nanodendrites with other typical PdCu and Pd catalysts with high performance.

| Catalysts                                                 | Test condition including the electrolyte and scanning rate | Activity                                |                                                     |                                      |                                                      | Ref       |
|-----------------------------------------------------------|------------------------------------------------------------|-----------------------------------------|-----------------------------------------------------|--------------------------------------|------------------------------------------------------|-----------|
|                                                           |                                                            | Specific activity (mA/cm <sup>2</sup> ) | Enhancement factor with Pd/C as a reference (times) | Mass activity (mA/mg <sub>Pd</sub> ) | Enhancement factor with Pd/C as a reference (times)) |           |
| Our Pd <sub>35</sub> Cu <sub>65</sub> alloy nanodendrites | 0.1M KOH+0.5M CH <sub>3</sub> OH<br>50mV/s                 | 0.54                                    | 9.3                                                 | 135                                  | 7.6                                                  | This work |
| Pd <sub>2</sub> Cu nanoparticles                          | 0.5M KOH+0.5M CH <sub>3</sub> OH<br>50mV/s                 | /                                       | /                                                   | 220                                  | 1.4                                                  | 49        |
| Porous PdCu nanoparticles                                 | 0.5M KOH+0.5M CH <sub>3</sub> OH<br>50mV/s                 | /                                       | /                                                   | 363                                  | 2.0                                                  | 33        |
| Pd <sub>3</sub> Cu alloy nanoparticles                    | 1M KOH+1M CH <sub>3</sub> OH<br>50mV/s                     | 2.05                                    | 3.0                                                 | 778.98                               | 3.7                                                  | 50        |
| Pd <sub>4</sub> Cu alloy nanoparticles                    | 1M KOH+1M CH <sub>3</sub> OH<br>25mV/s                     | 29                                      | 4.2                                                 | /                                    | /                                                    | 51        |
| Pd <sub>85</sub> Cu <sub>15</sub> alloy nanoparticles     | 1M KOH+1M CH <sub>3</sub> OH<br>50mV/s                     | /                                       | /                                                   | 588.7                                | 5.8                                                  | 31        |
| PdCu/VrGO                                                 | 1M KOH+1M CH <sub>3</sub> OH<br>50mV/s                     | /                                       | /                                                   | 762.8                                | 7.1                                                  | 47        |
| Porous Pd nanoflowers                                     | 0.5M KOH+0.25M CH <sub>3</sub> OH<br>1mV/s                 | /                                       | /                                                   | about 26                             | 1.7                                                  | 52        |
| Unusual Pd nanoparticles                                  | 1M KOH+1M CH <sub>3</sub> OH<br>50mV/s                     | 2.39                                    | 6.6                                                 | about 90                             | 1.7                                                  | 53        |
| Monodispersed Pd nanospheres                              | 1M NaOH+1M CH <sub>3</sub> OH<br>50mV/s                    | 5                                       | 2.6                                                 | /                                    | /                                                    | 54        |

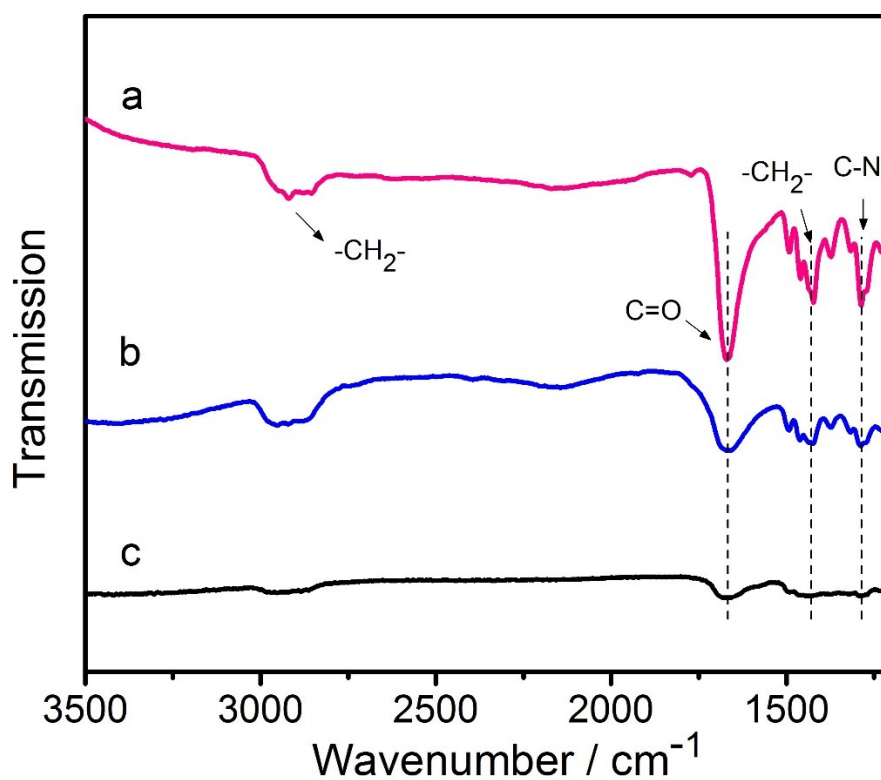

**Figure. S3** FTIR spectra of the  $\text{Pd}_{48}\text{Cu}_{52}$  nanodendrites treated by different treatment methods. The  $\text{Pd}_{48}\text{Cu}_{52}$  nanodendrites (a) were washed by alcohol for one time, (b) were washed by alcohol for four times, and (c) were treated by tert-butylamine and  $\text{NaBH}_4$  and washed by alcohol for three times.
